# Supplementary material
Source: PubMed Central journal article supplement (PMC3815429)
Supplement: NIHMS492752-supplement-Supplemental_Tables.pdf [file NIHMS492752-supplement-Supplemental_Tables.pdf]

**Table S1. Quantification of NMJ parameters for experiments in Figure 3B.**

|                                                                                   | Number of samples | Bouton number     | p value vs WT          | Muscle area ( $\mu\text{m}^2$ ) $\times 10^{-3}$ | p value vs WT    | Bouton number /Muscle area ( $\#/\mu\text{m}^2$ ) $\times 10^3$ | p value vs WT          | Satellite bouton number | p value vs WT          |
|-----------------------------------------------------------------------------------|-------------------|-------------------|------------------------|--------------------------------------------------|------------------|-----------------------------------------------------------------|------------------------|-------------------------|------------------------|
| <i>w<sup>1118</sup></i> (WT)                                                      | 20                | 119.85 $\pm$ 2.53 |                        | 89.01 $\pm$ 1.48                                 |                  | 1.35 $\pm$ 0.04                                                 |                        | 13.6 $\pm$ 0.6          |                        |
| revertant                                                                         | 18                | 117.72 $\pm$ 4.45 | 1                      | 89.17 $\pm$ 0.96                                 | 1                | 1.32 $\pm$ 0.04                                                 | 0.999                  | 12.3 $\pm$ 0.7          | 0.994                  |
| <i>spartin<sup>1</sup>/spartin<sup>1</sup></i>                                    | 20                | 167.5 $\pm$ 3.76  | <0.001                 | 87.73 $\pm$ 1.4                                  | 0.996            | 1.91 $\pm$ 0.03                                                 | <0.001                 | 25.2 $\pm$ 1.3          | <0.001                 |
| <i>spartin<sup>1</sup>/Df</i>                                                     | 20                | 171.7 $\pm$ 3.46  | <0.001                 | 91.69 $\pm$ 1.06                                 | 0.816            | 1.88 $\pm$ 0.04                                                 | <0.001                 | 25.6 $\pm$ 1.3          | <0.001                 |
| <i>C155-GAL4/+; Df/UAS-HA-spartin,spartin<sup>1</sup></i>                         | 20                | 116.7 $\pm$ 3.95  | 0.99                   | 91 $\pm$ 1.31                                    | 0.962            | 1.29 $\pm$ 0.05                                                 | 0.935                  | 12.3 $\pm$ 0.7          | 0.99                   |
| <i>C155-GAL4/+; Df/UAS-HA-spartin<math>\Delta</math>Eps15,spartin<sup>1</sup></i> | 18                | 171.22 $\pm$ 4.28 | <0.001                 | 91.42 $\pm$ 0.99                                 | 0.899            | 1.87 $\pm$ 0.04                                                 | <0.001                 | 21.6 $\pm$ 1.7          | <0.001                 |
| <i>C155-GAL4/+; Df/UAS-Myc-spartin-human,spartin<sup>1</sup></i>                  | 20                | 111.8 $\pm$ 2.16  | 1                      | 92.19 $\pm$ 0.47                                 | 0.643            | 1.29 $\pm$ 0.02                                                 | 0.927                  | 12.8 $\pm$ 0.4          | 1                      |
| <i>BG57-GAL4,Df/UAS-HA-spartin,spartin<sup>1</sup></i>                            | 17                | 169.94 $\pm$ 4.37 | <0.001                 | 93.35 $\pm$ 1.24                                 | 0.282            | 1.83 $\pm$ 0.06                                                 | <0.001                 | 22.5 $\pm$ 1.5          | <0.001                 |
|                                                                                   |                   |                   | p value vs C155-GAL4/+ |                                                  | p value vs C155- |                                                                 | p value vs C155-GAL4/+ |                         | p value vs C155-GAL4/+ |
| <i>C155-GAL4/+</i>                                                                | 17                | 124.59 $\pm$ 4.37 |                        | 91.59 $\pm$ 1.85                                 |                  | 1.36 $\pm$ 0.05                                                 |                        | 13.2 $\pm$ 0.9          |                        |
| <i>C155-GAL4/+; UAS-HA-spartin/+</i>                                              | 16                | 107.38 $\pm$ 5.44 | <0.01                  | 93.59 $\pm$ 1.6                                  | 0.42             | 1.15 $\pm$ 0.05                                                 | <0.01                  | 8.2 $\pm$ 0.6           | <0.001                 |

**Table S2. Quantification of NMJ parameters for experiments in Figure S2D.**

|                                                                | <b>Number of samples</b> | <b>Bouton number</b> | p value vs WT | <b>Muscle area (<math>\mu\text{m}^2</math>)<math>\times 10^{-3}</math></b> | p value vs WT | <b>Bouton number /Muscle area (<math>\#/\mu\text{m}^2</math>)<math>\times 10^3</math></b> | p value vs WT | <b>Satellite bouton number</b> | p value vs WT |
|----------------------------------------------------------------|--------------------------|----------------------|---------------|----------------------------------------------------------------------------|---------------|-------------------------------------------------------------------------------------------|---------------|--------------------------------|---------------|
| <i>w</i> <sup>1118</sup> (WT)                                  | 15                       | 125.67 $\pm$ 4       |               | 91.03 $\pm$ 0.93                                                           |               | 1.38                                                                                      |               | 13.1                           |               |
| <i>spartin</i> <sup>1</sup> /+                                 | 10                       | 126.5 $\pm$ 1.36     | 0.999         | 98.76 $\pm$ 1.48                                                           | n.s           | 1.41                                                                                      | 0.958         | 13.5                           | 0.983         |
| <i>eps15</i> <sup>e75</sup> /+                                 | 10                       | 126.4 $\pm$ 3.82     | 0.999         | 88.45 $\pm$ 2.48                                                           | n.s           | 1.43                                                                                      | 0.861         | 12.7                           | 0.99          |
| <i>eps15</i> <sup>e75</sup> /+, <i>spartin</i> <sup>1</sup> /+ | 13                       | 159.92 $\pm$ 4.84    | <0.001        | 91.38 $\pm$ 1.15                                                           | n.s           | 1.75                                                                                      | <0.001        | 21.3                           | <0.001        |

**Table S3. Quantification of NMJ parameters for experiments in Figure S3.**

**Figure S3B**

|                                                    | Number of samples | Bouton number     | p value vs C155-GAL4/+      | Muscle area ( $\mu\text{m}^2$ ) $\times 10^{-3}$ | p value vs C155-GAL4/+      | Bouton number /Muscle area ( $\#/\mu\text{m}^2$ ) $\times 10^3$ | p value vs C155-GAL4/+      | Satellite bouton number | p value vs C155-GAL4/+      |
|----------------------------------------------------|-------------------|-------------------|-----------------------------|--------------------------------------------------|-----------------------------|-----------------------------------------------------------------|-----------------------------|-------------------------|-----------------------------|
| <i>C155-GAL4/+</i>                                 | 18                | 121.28 $\pm$ 3.6  |                             | 90.44 $\pm$ 1.6                                  |                             | 1.35 $\pm$ 0.04                                                 |                             | 12.4 $\pm$ 0.8          |                             |
| <i>C155-GAL4/+; UAS-wit/+</i>                      | 18                | 145.17 $\pm$ 4.67 | <0.01                       | 92.94 $\pm$ 1.15                                 | 0.761                       | 1.56 $\pm$ 0.05                                                 | <0.05                       | 14.9 $\pm$ 1.6          | 0.693                       |
| <i>C155-GAL4/+; UAS-tkv<sup>CA</sup>/+</i>         | 18                | 166.94 $\pm$ 5.04 | <0.001                      | 97.11 $\pm$ 1.65                                 | 0.053                       | 1.72 $\pm$ 0.04                                                 | <0.001                      | 21 $\pm$ 1.4            | <0.01                       |
| <i>C155-GAL4/+; UAS-wit,UAS-tkv<sup>CA</sup>/+</i> | 17                | 207.71 $\pm$ 6.21 | <0.001                      | 85.11 $\pm$ 2.65                                 | 0.179                       | 2.46 $\pm$ 0.07                                                 | <0.001                      | 32.5 $\pm$ 2.4          | <0.001                      |
|                                                    |                   |                   | p value vs <i>BG57-GAL4</i> |                                                  | p value vs <i>BG57-GAL4</i> |                                                                 | p value vs <i>BG57-GAL4</i> |                         | p value vs <i>BG57-GAL4</i> |
| <i>BG57-GAL4/+</i>                                 | 18                | 115.5 $\pm$ 1.85  |                             | 91.37 $\pm$ 1.58                                 |                             | 1.27 $\pm$ 0.02                                                 |                             | 13.1 $\pm$ 0.7          |                             |
| <i>BG57-GAL4/UAS-gbb</i>                           | 21                | 161.67 $\pm$ 4.55 | <0.001                      | 88.2 $\pm$ 1.5                                   | 0.154                       | 1.84 $\pm$ 0.05                                                 | <0.001                      | 23.8 $\pm$ 1.3          | <0.001                      |

**Figure S3C**

|                                                     | Number of samples | Bouton number     | p value vs WT | Muscle area ( $\mu\text{m}^2$ ) $\times 10^{-3}$ | p value vs WT | Bouton number /Muscle area ( $\#/\mu\text{m}^2$ ) $\times 10^3$ | p value vs WT | Satellite bouton number | p value vs WT |
|-----------------------------------------------------|-------------------|-------------------|---------------|--------------------------------------------------|---------------|-----------------------------------------------------------------|---------------|-------------------------|---------------|
| <i>w<sup>1118</sup></i> (WT)                        | 18                | 119.33 $\pm$ 3    | 0.905         | 89.24 $\pm$ 1.35                                 |               | 1.34 $\pm$ 0.04                                                 |               | 12.7 $\pm$ 0.6          |               |
| <i>spartin<sup>1</sup>/+</i>                        | 18                | 126.72 $\pm$ 1.52 | 1             | 90.4 $\pm$ 1.35                                  | n.s           | 1.41 $\pm$ 0.02                                                 | 0.98          | 13 $\pm$ 0.6            | 1             |
| <i>dap160<sup>Δ1</sup>/+</i>                        | 18                | 119.06 $\pm$ 5.71 | 1             | 86.39 $\pm$ 2.65                                 | n.s           | 1.38 $\pm$ 0.06                                                 | 0.998         | 13.9 $\pm$ 0.6          | 0.987         |
| <i>endoA<sup>Δ4</sup>/+</i>                         | 19                | 121.21 $\pm$ 4    | 1             | 91.08 $\pm$ 1.52                                 | n.s           | 1.33 $\pm$ 0.05                                                 | 1             | 13.8 $\pm$ 0.9          | 0.989         |
| <i>synj<sup>1</sup>/+</i>                           | 20                | 120.5 $\pm$ 3.94  | 1             | 90.52 $\pm$ 1.63                                 | n.s           | 1.33 $\pm$ 0.04                                                 | 1             | 13.6 $\pm$ 0.4          | 0.998         |
| <i>dap160<sup>Δ1</sup>/+; spartin<sup>1</sup>/+</i> | 18                | 163.17 $\pm$ 4.31 | <0.001        | 88.54 $\pm$ 2.37                                 | n.s           | 1.86 $\pm$ 0.05                                                 | <0.001        | 20.9 $\pm$ 1            | <0.001        |
| <i>spartin<sup>1</sup>,+/,endoA<sup>Δ4</sup></i>    | 18                | 173.83 $\pm$ 4.16 | <0.001        | 88.16 $\pm$ 1.39                                 | n.s           | 1.98 $\pm$ 0.05                                                 | <0.001        | 22.9 $\pm$ 1.4          | <0.001        |
| <i>synj<sup>1</sup>/+; spartin<sup>1</sup>/+</i>    | 16                | 166.69 $\pm$ 4.65 | <0.001        | 94.49 $\pm$ 1.26                                 | n.s           | 1.77 $\pm$ 0.06                                                 | <0.001        | 23.6 $\pm$ 1.1          | <0.001        |

**Table S4. Quantification of NMJ parameters for experiments in Figure 5B.**

|                                                                                                 | <b>Number of samples</b> | <b>Bouton number</b> | p value vs WT | <b>Muscle area (<math>\mu\text{m}^2</math>)X10<sup>-3</sup></b> | p value vs WT | <b>Bouton number /Muscle area (<math>\#/\mu\text{m}^2</math>)X 10<sup>3</sup></b> | p value vs WT | <b>Satellite bouton number</b> | p value vs WT |
|-------------------------------------------------------------------------------------------------|--------------------------|----------------------|---------------|-----------------------------------------------------------------|---------------|-----------------------------------------------------------------------------------|---------------|--------------------------------|---------------|
| <i>w</i> <sup>1118</sup> (WT)                                                                   | 15                       | 119.33±1.93          |               | 91.71±1                                                         |               | 1.3±0.02                                                                          |               | 13.8±3.9                       |               |
| <i>spartin</i> <sup>1</sup> / <i>Df</i>                                                         | 16                       | 172.19±5.65          | <0.001        | 93.28±1.13                                                      | 0.949         | 1.85±0.06                                                                         | <0.001        | 25.6±1.5                       | <0.001        |
| <i>wit</i> <sup>A12</sup> / <i>wit</i> <sup>B11</sup>                                           | 18                       | 66.39±3.01           | <0.001        | 69.32±1.31                                                      | <0.001        | 0.96±0.04                                                                         | <0.001        | 2.1±0.3                        | <0.001        |
| <i>wit</i> <sup>A12</sup> , <i>spartin</i> <sup>1</sup> / <i>wit</i> <sup>B11</sup> , <i>Df</i> | 19                       | 68.68±2.65           | <0.001        | 65.69±1.49                                                      | <0.001        | 1.05±0.04                                                                         | <0.001        | 3±0.4                          | <0.001        |
| <i>wit</i> <sup>A12</sup> /+                                                                    | 16                       | 121.38±3.21          | 0.999         | 95.16±0.77                                                      | 0.378         | 1.28±0.04                                                                         | 0.998         | 13.2±0.3                       | 0.4           |
| <i>wit</i> <sup>A12</sup> , <i>spartin</i> <sup>1</sup> /+, <i>Df</i>                           | 24                       | 121.21±2.56          | 0.999         | 93.27±0.97                                                      | 0.929         | 1.3±0.03                                                                          | 1             | 13.9±0.5                       | 1             |

**Table S5. Quantification of NMJ parameters for experiments in Figure S4I.**

|                                                                                   | Number of Samples | Bouton number     | p value vs WT | Muscle area ( $\mu\text{m}^2$ ) $\times 10^{-3}$ | p value vs WT | Bouton number /Muscle area ( $\#/\mu\text{m}^2$ ) $\times 10^3$ | p value vs WT | Satellite bouton number | p value vs WT |
|-----------------------------------------------------------------------------------|-------------------|-------------------|---------------|--------------------------------------------------|---------------|-----------------------------------------------------------------|---------------|-------------------------|---------------|
| <i>w</i> <sup>1118</sup> (WT)                                                     | 20                | 117.7 $\pm$ 3.55  |               | 91.57 $\pm$ 0.85                                 |               | 1.29 $\pm$ 0.04                                                 |               | 13.1 $\pm$ 0.6          |               |
| <i>spartin</i> <sup>1</sup> / <i>Df</i>                                           | 20                | 171.85 $\pm$ 3.61 | <0.001        | 91.3 $\pm$ 1.21                                  | 1             | 1.88 $\pm$ 0.04                                                 | <0.001        | 25.7 $\pm$ 1.3          | <0.001        |
| <i>futsch</i> <sup>K68</sup> /+                                                   | 19                | 124.89 $\pm$ 4.26 | 0.797         | 98.63 $\pm$ 1.09                                 | <0.01         | 1.27 $\pm$ 0.05                                                 | 1             | 11.2 $\pm$ 0.5          | 0.554         |
| <i>futsch</i> <sup>K68</sup> /+; <i>spartin</i> <sup>1</sup> / <i>Df</i>          | 19                | 134.37 $\pm$ 5.29 | <0.05         | 97.74 $\pm$ 1.43                                 | <0.05         | 1.39 $\pm$ 0.06                                                 | 0.653         | 10.9 $\pm$ 0.9          | 0.406         |
| <i>futsch</i> <sup>K68</sup> / <i>Y</i>                                           | 18                | 93.5 $\pm$ 3.02   | <0.001        | 86.9 $\pm$ 1                                     | 0.324         | 1.08 $\pm$ 0.03                                                 | <0.05         | 7.3 $\pm$ 0.5           | <0.001        |
| <i>futsch</i> <sup>K68</sup> / <i>Y</i> ; <i>spartin</i> <sup>1</sup> / <i>Df</i> | 18                | 99.39 $\pm$ 4.07  | <0.05         | 91.78 $\pm$ 1.53                                 | 1             | 1.09 $\pm$ 0.05                                                 | <0.05         | 7.1 $\pm$ 0.6           | <0.001        |
| <i>gbb</i> <sup>1</sup> /+                                                        | 18                | 115.56 $\pm$ 3.33 | 1             | 89.42 $\pm$ 1.17                                 | 0.991         | 1.29 $\pm$ 0.04                                                 | 1             | 10.3 $\pm$ 0.5          | <0.05         |
| <i>wit</i> <sup>A12</sup> /+                                                      | 18                | 118.89 $\pm$ 2.34 | 1             | 91.62 $\pm$ 1.23                                 | 1             | 1.3 $\pm$ 0.04                                                  | 1             | 11.4 $\pm$ 0.5          | 0.461         |
| <i>mad</i> <sup>273</sup> /+                                                      | 18                | 118.06 $\pm$ 3.67 | 1             | 91.96 $\pm$ 1.33                                 | 1             | 1.29 $\pm$ 0.05                                                 | 1             | 11.6 $\pm$ 0.6          | 0.633         |
| <i>futsch</i> <sup>K68</sup> /+; <i>gbb</i> <sup>1</sup> /+                       | 18                | 76.44 $\pm$ 2.63  | <0.001        | 93.76 $\pm$ 1.76                                 | 0.989         | 0.82 $\pm$ 0.03                                                 | <0.001        | 5.1 $\pm$ 0.7           | <0.001        |
| <i>futsch</i> <sup>K68</sup> /+; <i>wit</i> <sup>A12</sup> /+                     | 16                | 92.69 $\pm$ 4.27  | <0.001        | 93.11 $\pm$ 0.9                                  | 1             | 1 $\pm$ 0.05                                                    | <0.001        | 6 $\pm$ 0.5             | <0.001        |
| <i>futsch</i> <sup>K68</sup> /+; <i>mad</i> <sup>273</sup> /+                     | 17                | 93.53 $\pm$ 5.39  | <0.001        | 89.96 $\pm$ 1.89                                 | 0.999         | 1.04 $\pm$ 0.06                                                 | <0.01         | 7.4 $\pm$ 0.8           | <0.001        |

**Table S6. Quantification of NMJ parameters for experiments in Figure 6.**

**Figure 6B**

|                                                   | Number of samples | Vinblastine(VB) treatment | Bouton number     | p value vs -VB | p value vs WT                 | Muscle area ( $\mu\text{m}^2$ ) $\times 10^{-3}$ | p value vs -VB | p value vs WT                 | Bouton number /Muscle area ( $\#\mu\text{m}^2$ ) $\times 10^3$ | p value vs -VB | p value vs WT                 | Satellite bouton number | p value vs -VB | p value vs WT                 |
|---------------------------------------------------|-------------------|---------------------------|-------------------|----------------|-------------------------------|--------------------------------------------------|----------------|-------------------------------|----------------------------------------------------------------|----------------|-------------------------------|-------------------------|----------------|-------------------------------|
| <i>w<sup>1118</sup></i> (WT)                      | 15                | -                         | 119.13 $\pm$ 4.06 |                |                               | 90.9 $\pm$ 0.64                                  |                |                               | 1.31 $\pm$ 0.04                                                |                |                               | 13.6 $\pm$ 0.6          |                |                               |
| <i>w<sup>1118</sup></i> (WT)                      | 15                | +                         | 121.13 $\pm$ 2.04 | 0.999          |                               | 90.94 $\pm$ 0.64                                 | 1              |                               | 1.330.03                                                       | 0.999          |                               | 14.2 $\pm$ 0.8          | 0.999          |                               |
| <i>spartin<sup>1</sup>/Df</i>                     | 15                | -                         | 168 $\pm$ 3.95    |                | <0.001                        | 91.02 $\pm$ 1.09                                 |                | 1                             | 1.85 $\pm$ 0.04                                                |                | <0.001                        | 23.4 $\pm$ 1            |                | <0.001                        |
| <i>spartin<sup>1</sup>/Df</i>                     | 15                | +                         | 124.2 $\pm$ 2.87  | <0.001         | 0.955                         | 91.76 $\pm$ 0.85                                 | 1              | 0.999                         | 1.36 $\pm$ 0.04                                                | <0.001         | 0.944                         | 13.8 $\pm$ 0.7          | <0.001         | 1                             |
| <i>dad<sup>J1e4</sup>/dad<sup>J1e4</sup></i>      | 20                | -                         | 158.15 $\pm$ 4.68 |                | <0.001                        | 83.04 $\pm$ 2.04                                 |                | <0.01                         | 1.92 $\pm$ 0.06                                                |                | <0.001                        | 24.7 $\pm$ 1            |                | <0.001                        |
| <i>dad<sup>J1e4</sup>/dad<sup>J1e4</sup></i>      | 20                | +                         | 123.05 $\pm$ 4.27 | <0.001         | 0.98                          | 80.55 $\pm$ 2.12                                 | 0.822          | <0.001                        | 1.53 $\pm$ 0.05                                                | <0.001         | <0.01                         | 14.4 $\pm$ 1            | <0.001         | 0.991                         |
|                                                   |                   |                           |                   |                | p value vs <i>C155-GAL4/+</i> |                                                  |                | p value vs <i>C155-GAL4/+</i> |                                                                |                | p value vs <i>C155-GAL4/+</i> |                         |                | p value vs <i>C155-GAL4/+</i> |
| <i>C155-GAL4/+</i>                                | 18                | -                         | 123 $\pm$ 3.57    |                |                               | 91.36 $\pm$ 1.85                                 |                |                               | 1.35 $\pm$ 0.04                                                |                |                               | 13.1 $\pm$ 0.8          |                |                               |
| <i>C155-GAL4/+</i>                                | 18                | +                         | 126.9 $\pm$ 3.33  | 0.88           |                               | 98.51 $\pm$ 1.22                                 | <0.01          |                               | 1.29 $\pm$ 0.04                                                | 0.69           |                               | 12.7 $\pm$ 0.7          | 1              |                               |
| <i>C155-GAL4/+; UAS-<i>tkv</i><sup>CA</sup>/+</i> | 18                | -                         | 173.3 $\pm$ 4.57  |                | <0.001                        | 98.5 $\pm$ 1.53                                  |                | <0.01                         | 1.76 $\pm$ 0.04                                                |                | <0.001                        | 22.3 $\pm$ 1.4          |                | <0.001                        |
| <i>C155-GAL4/+; UAS-<i>tkv</i><sup>CA</sup>/+</i> | 17                | +                         | 135.59 $\pm$ 3.27 | <0.001         | 0.094                         | 95.61 $\pm$ 1.59                                 | 0.566          | 0.234                         | 1.42 $\pm$ 0.03                                                | <0.001         | 0.605                         | 12.4 $\pm$ 0.6          | <0.001         | 0.991                         |

**Figure 6D**

|                                                     | Number of samples | Bouton number     | p value vs WT | Muscle area ( $\mu\text{m}^2$ ) $\times 10^{-3}$ | p value vs WT | Bouton number /Muscle area ( $\#\mu\text{m}^2$ ) $\times 10^3$ | p value vs WT | Satellite bouton number | p value vs WT |
|-----------------------------------------------------|-------------------|-------------------|---------------|--------------------------------------------------|---------------|----------------------------------------------------------------|---------------|-------------------------|---------------|
| <i>w<sup>1118</sup></i> (WT)                        | 18                | 119.33 $\pm$ 2.9  |               | 89.14 $\pm$ 1.35                                 |               | 1.34 $\pm$ 0.04                                                |               | 12.7 $\pm$ 0.6          |               |
| <i>dfmr1<sup>Δ50M</sup>/dfmr1<sup>Δ50M</sup></i>    | 17                | 168.65 $\pm$ 4.36 | <0.001        | 84.42 $\pm$ 1.26                                 | 0.214         | 2 $\pm$ 0.05                                                   | <0.001        | 25.1 $\pm$ 1.5          | <0.001        |
| <i>spartin<sup>1</sup>/+</i>                        | 18                | 126.72 $\pm$ 1.52 | 0.789         | 90.41 $\pm$ 1.35                                 | 0.995         | 1.41 $\pm$ 0.02                                                | 0.958         | 13 $\pm$ 0.6            | 1             |
| <i>dad<sup>J1e4</sup>/+</i>                         | 18                | 121.33 $\pm$ 2.58 | 1             | 89.25 $\pm$ 1.62                                 | 1             | 1.37 $\pm$ 0.04                                                | 1             | 12.1 $\pm$ 0.7          | 0.999         |
| <i>dfmr1<sup>Δ50M</sup>/+</i>                       | 20                | 129.5 $\pm$ 4.35  | 0.408         | 92.11 $\pm$ 1.37                                 | 0.714         | 1.41 $\pm$ 0.05                                                | 0.929         | 14 $\pm$ 1              | 0.961         |
| <i>spartin<sup>1</sup>,+/+,dfmr1<sup>Δ50M</sup></i> | 20                | 183.9 $\pm$ 4.68  | <0.001        | 91.78 $\pm$ 1.1                                  | 0.813         | 2.01 $\pm$ 0.06                                                | <0.001        | 28.2 $\pm$ 0.8          | <0.001        |
| <i>dfmr1<sup>Δ50M</sup>,+/+,dad<sup>J1e4</sup></i>  | 18                | 178.22 $\pm$ 3.44 | <0.001        | 91 $\pm$ 1.52                                    | 0.964         | 1.96 $\pm$ 0.04                                                | <0.001        | 26.3 $\pm$ 1.13         | <0.001        |
